# Supplementary material for: Stability and Assembly Mechanisms of Butterfly Communities across Environmental Gradients of a Subtropical Mountain
Source: MDPI journal article supplement (doi:10.3390/insects15040230), 2024-03-27
Supplement: s1 [file s1]

**Supplementary Table S1.** Checklist of identified butterflies in the Chebaling study area.

| NO. | Family       | Genus            | Species                    |
|-----|--------------|------------------|----------------------------|
| 1.  | Papilionidae | <i>Papilio</i>   | <i>Papilio paris</i>       |
| 2.  |              |                  | <i>Papilio dialis</i>      |
| 3.  |              |                  | <i>Papilio bianor</i>      |
| 4.  |              |                  | <i>Papilio protenor</i>    |
| 5.  |              |                  | <i>Papilio memnon</i>      |
| 6.  |              |                  | <i>Papilio machaon</i>     |
| 7.  |              |                  | <i>Papilio xuthus</i>      |
| 8.  |              |                  | <i>Papilio polytes</i>     |
| 9.  |              |                  | <i>Papilio helenus</i>     |
| 10. |              |                  | <i>Papilio nephelus</i>    |
| 11. | Pieridae     | <i>Graphium</i>  | <i>Graphium sarpedon</i>   |
| 12. |              |                  | <i>Graphium cloanthus</i>  |
| 13. |              |                  | <i>Graphium chironides</i> |
| 14. |              | <i>Meandrusa</i> | <i>Meandrusa lachinus</i>  |
| 15. |              |                  | <i>Eurema hecabe</i>       |
| 16. |              | <i>Eurema</i>    | <i>Eurema blanda</i>       |
| 17. |              |                  | <i>Eurema laeta</i>        |
| 18. |              |                  | <i>Catopsilia pyranthe</i> |
| 19. |              |                  | <i>Hebomoia glaucippe</i>  |
| 20. |              |                  | <i>Ixias pyrene</i>        |
| 21. |              |                  | <i>Leptosia nina</i>       |
| 22. |              |                  | <i>Talbotia naganum</i>    |
| 23. |              |                  | <i>Pieris rapae</i>        |
| 24. |              |                  | <i>Pieris canidia</i>      |
| 25. | Lycaenidae   | <i>Cepora</i>    | <i>Cepora nadina</i>       |
| 26. |              |                  | <i>Cepora nerissa</i>      |
| 27. |              | <i>Delias</i>    | <i>Delias pasithoe</i>     |
| 28. |              |                  | <i>Delias acalis</i>       |
| 29. |              | <i>Taraka</i>    | <i>Taraka hamada</i>       |
| 30. |              | <i>Allotinus</i> | <i>Allotinus drumila</i>   |
| 31. |              | <i>Miletus</i>   | <i>Miletus chinensis</i>   |
| 32. |              | <i>Curetis</i>   | <i>Curetis acuta</i>       |

---

|     |                     |                                |
|-----|---------------------|--------------------------------|
| 33. | <i>Ravenna</i>      | <i>Ravenna nivea</i>           |
| 34. | <i>Leucantigius</i> | <i>Leucantigius atayalicus</i> |
| 35. | <i>Yamamo</i>       | <i>Yamamo tozephyrus</i>       |
| 36. | <i>Arhopala</i>     | <i>Arhopala ganesa</i>         |
| 37. |                     | <i>Arhopala paramuta</i>       |
| 38. |                     | <i>Arhopala bazalus</i>        |
| 39. |                     | <i>Arhopala rama</i>           |
| 40. | <i>Mahathaio</i>    | <i>Mahathaio ameria</i>        |
| 41. | <i>Catapaecilma</i> | <i>Catapaecilma major</i>      |
| 42. | <i>Tajuria</i>      | <i>Tajuria maculata</i>        |
| 43. | <i>Spindasis</i>    | <i>Spindasis syama</i>         |
| 44. |                     | <i>Spindasis lohita</i>        |
| 45. | <i>Sinthus</i>      | <i>Sinthus chandrana</i>       |
| 46. | <i>Ancema</i>       | <i>Ancema ctesia</i>           |
| 47. | <i>Deudorix</i>     | <i>Deudorix epijarbas</i>      |
| 48. | <i>Rapala</i>       | <i>Rapala varuna</i>           |
| 49. |                     | <i>Rapala micans</i>           |
| 50. |                     | <i>Rapala manea</i>            |
| 51. | <i>Heliophorus</i>  | <i>Heliophorus ila</i>         |
| 52. | <i>Nacaduba</i>     | <i>Nacaduba kurava</i>         |
| 53. |                     | <i>Nacaduba berenice</i>       |
| 54. | <i>Jamides</i>      | <i>Jamides bochus</i>          |
| 55. |                     | <i>Jamides celeno</i>          |
| 56. | <i>Zizeeria</i>     | <i>Zizeeria maha</i>           |
| 57. | <i>Lampides</i>     | <i>Lampides boeticus</i>       |
| 58. | <i>Everes</i>       | <i>Everes argiades</i>         |
| 59. | <i>Pithecops</i>    | <i>Pithecops corvus</i>        |
| 60. | <i>Udara</i>        | <i>Udara dilecta</i>           |
| 61. |                     | <i>Udara albocaerulea</i>      |
| 62. | <i>Acytoplepis</i>  | <i>Acytoplepis puspa</i>       |
| 63. | <i>Celastrina</i>   | <i>Celastrina argiolus</i>     |
| 64. | <i>Euchrysops</i>   | <i>Euchrysops cnejus</i>       |
| 65. | <i>Chilades</i>     | <i>Chilades pandava</i>        |
| 66. | <i>Tongeia</i>      | <i>Tongeia filicaudis</i>      |
| 67. | <i>Abisara</i>      | <i>Abisara fylla</i>           |

---

---

|      |                 |                               |
|------|-----------------|-------------------------------|
| 68.  |                 | <i>Abisara neophron</i>       |
| 69.  |                 | <i>Abisara burnii</i>         |
| 70.  |                 | <i>Abisara echerius</i>       |
| 71.  | <i>Stiboges</i> | <i>Stiboges nymphidia</i>     |
| 72.  | <i>Zemeros</i>  | <i>Zemeros flegyas</i>        |
| 73.  | <i>Dodona</i>   | <i>Dodona deodata</i>         |
| 74.  |                 | <i>Dodona eugenes</i>         |
| 75.  |                 | <i>Dodona egeon</i>           |
| 76.  | Nymphalidae     | <i>Danaus</i>                 |
| 77.  |                 | <i>Parantica</i>              |
| 78.  |                 | <i>Parantica aglea</i>        |
| 79.  |                 | <i>Parantica melaneus</i>     |
| 80.  |                 | <i>Euploea</i>                |
| 81.  |                 | <i>Euploea midamus</i>        |
| 82.  |                 | <i>Acraea</i>                 |
| 83.  |                 | <i>Acraea issoria</i>         |
| 84.  |                 | <i>Cethosia</i>               |
| 85.  |                 | <i>Cethosia biblis</i>        |
| 86.  |                 | <i>Argyreus</i>               |
| 87.  |                 | <i>Argyreus hyperbius</i>     |
| 88.  |                 | <i>Damora</i>                 |
| 89.  |                 | <i>Damora sagana</i>          |
| 90.  |                 | <i>Argyronome</i>             |
| 91.  |                 | <i>Argyronome laodice</i>     |
| 92.  |                 | <i>Kallima</i>                |
| 93.  |                 | <i>Kallima inachus</i>        |
| 94.  |                 | <i>Hypolimnas</i>             |
| 95.  |                 | <i>Hypolimnas bolina</i>      |
| 96.  |                 | <i>Kaniska</i>                |
| 97.  |                 | <i>Kaniska canacev</i>        |
| 98.  |                 | <i>Polygonia</i>              |
| 99.  |                 | <i>Polygonia c-aureum</i>     |
| 100. |                 | <i>Junonia</i>                |
| 101. |                 | <i>Junonia orithya</i>        |
| 102. |                 | <i>Junonia iphita</i>         |
|      |                 | <i>Junonia almana</i>         |
|      |                 | <i>Symbrenthia</i>            |
|      |                 | <i>Symbrenthia liaea</i>      |
|      |                 | <i>Symbrenthia brabira</i>    |
|      |                 | <i>Symbrenthia hypselis</i>   |
|      |                 | <i>Ariadne</i>                |
|      |                 | <i>Ariadne ariadne</i>        |
|      |                 | <i>Ariadne merione</i>        |
|      |                 | <i>Bhagadatta</i>             |
|      |                 | <i>Bhagadatta austenia</i>    |
|      |                 | <i>Euthalia</i>               |
|      |                 | <i>Euthalia guangdongensi</i> |
|      |                 | <i>Euthalia kosempona</i>     |
|      |                 | <i>Euthalia omeia</i>         |
|      |                 | <i>Euthalia bunzoi</i>        |
|      |                 | <i>Euthalia pratti</i>        |

---

---

|      |                    |                               |
|------|--------------------|-------------------------------|
| 103. |                    | <i>Euthalia strephon</i>      |
| 104. |                    | <i>Euthalia thibetana</i>     |
| 105. |                    | <i>Euthalia aconthea</i>      |
| 106. |                    | <i>Euthalia lubentna</i>      |
| 107. |                    | <i>Euthalia irrubescens</i>   |
| 108. | <i>Cynitia</i>     | <i>Cynitia whiteheadi</i>     |
| 109. | <i>Abrota</i>      | <i>Abrota ganga</i>           |
| 110. | <i>Limenitis</i>   | <i>Limenitis sulpitia</i>     |
| 111. | <i>Parasarpa</i>   | <i>Parasarpa dudu</i>         |
| 112. | <i>Athyma</i>      | <i>Athyma ranga</i>           |
| 113. |                    | <i>Athyma cama</i>            |
| 114. |                    | <i>Athyma selenophora</i>     |
| 115. |                    | <i>Athyma jina</i>            |
| 116. |                    | <i>Athyma asura</i>           |
| 117. |                    | <i>Athyma opalina</i>         |
| 118. |                    | <i>Athyma zeroa</i>           |
| 119. | <i>Neptis</i>      | <i>Neptis kuangtungensis</i>  |
| 120. |                    | <i>Neptis yerburii</i>        |
| 121. |                    | <i>Neptis manasa</i>          |
| 122. |                    | <i>Neptis sankara</i>         |
| 123. |                    | <i>Neptis philyra</i>         |
| 124. |                    | <i>Neptis cartica</i>         |
| 125. |                    | <i>Neptis clinia</i>          |
| 126. |                    | <i>Neptis soma</i>            |
| 127. |                    | <i>Neptis miah</i>            |
| 128. |                    | <i>Neptis hylas</i>           |
| 129. |                    | <i>Neptis sappho</i>          |
| 130. |                    | <i>Neptis anantad</i>         |
| 131. | <i>Phaedyra</i>    | <i>Phaedyra aspasiav</i>      |
| 132. | <i>Pantoporia</i>  | <i>Pantoporia hordonia</i>    |
| 133. | <i>Stibochiona</i> | <i>Stibochiona nicea</i>      |
| 134. | <i>Dichorragia</i> | <i>Dichorragia nesimachus</i> |
| 135. | <i>Cyrestis</i>    | <i>Cyrestis thyodamas</i>     |
| 136. | <i>Apatura</i>     | <i>Apatura iliav</i>          |
| 137. | <i>Rohana</i>      | <i>Rohana parisatis</i>       |

---

---

|      |                       |                               |
|------|-----------------------|-------------------------------|
| 138. | <i>Helcyra</i>        | <i>Helcyra superba</i>        |
| 139. |                       | <i>Helcyra subalba</i>        |
| 140. | <i>Sephisa</i>        | <i>Sephisa chandra</i>        |
| 141. | <i>Sasainia</i>       | <i>Sasainia funebris</i>      |
| 142. | <i>Hestina</i>        | <i>Hestina assimilis</i>      |
| 143. | <i>Timelaea</i>       | <i>Timelaea albescens</i>     |
| 144. | <i>Polyura</i>        | <i>Polyura narcaea</i>        |
| 145. |                       | <i>Polyura eudamippus</i>     |
| 146. |                       | <i>Polyura nepenthes</i>      |
| 147. | <i>Charaxes</i>       | <i>Charaxes bernardus</i>     |
| 148. | <i>Mimathyma</i>      | <i>Mimathyma chevana</i>      |
| 149. | <i>Discophora</i>     | <i>Discophora sondaica</i>    |
| 150. | <i>Enispe</i>         | <i>Enispe lunatum</i>         |
| 151. | <i>Aemona</i>         | <i>Aemona amathusia</i>       |
| 152. | <i>Stichophthalma</i> | <i>Stichophthalma suffusa</i> |
| 153. | <i>Penthema</i>       | <i>Penthema adelma</i>        |
| 154. | <i>Neorina</i>        | <i>Neorina patria</i>         |
| 155. | <i>Melanitis</i>      | <i>Melanitis leda</i>         |
| 156. |                       | <i>Melanitis phedima</i>      |
| 157. | <i>Lethe</i>          | <i>Lethe dura</i>             |
| 158. |                       | <i>Lethe hyrانيا</i>          |
| 159. |                       | <i>Lethe chandica</i>         |
| 160. |                       | <i>Lethe verma</i>            |
| 161. |                       | <i>Lethe helena</i>           |
| 162. |                       | <i>Lethe satyrina</i>         |
| 163. |                       | <i>Lethe confusa</i>          |
| 164. |                       | <i>Lethe syrcis</i>           |
| 165. |                       | <i>Lethe europa</i>           |
| 166. |                       | <i>Lethe mekara</i>           |
| 167. |                       | <i>Lethe sisii</i>            |
| 168. | <i>Neope</i>          | <i>Neope muirheadii</i>       |
| 169. |                       | <i>Neope bremeri</i>          |
| 170. |                       | <i>Neope contrasta</i>        |
| 171. | <i>Mandarinia</i>     | <i>Mandarinia regalis</i>     |
| 172. | <i>Mycalesis</i>      | <i>Mycalesis franciscav</i>   |

---

---

|      |                     |                                   |
|------|---------------------|-----------------------------------|
| 173. |                     | <i>Mycalesis mucianus</i>         |
| 174. |                     | <i>Mycalesis mineus</i>           |
| 175. |                     | <i>Mycalesis sangaica</i>         |
| 176. |                     | <i>Mycalesis gotama</i>           |
| 177. | <i>Ypthima</i>      | <i>Ypthima multistriata</i>       |
| 178. |                     | <i>Ypthima imitans</i>            |
| 179. |                     | <i>Ypthima baldus</i>             |
| 180. |                     | <i>Ypthima praenubila</i>         |
| 181. |                     | <i>Ypthima tappana</i>            |
| 182. |                     | <i>Ypthima motschulskyi</i>       |
| 183. | <i>Palaeonympha</i> | <i>Palaeonympha opalina</i>       |
| 184. | <i>Hemadara</i>     | <i>Hemadara narasingha</i>        |
| 185. | Hesperiidae         | <i>Bibasis</i>                    |
| 186. |                     | <i>Bibasis miracula</i>           |
| 187. |                     | <i>Choaspes benjaminii</i>        |
| 188. |                     | <i>Hasora vitta</i>               |
| 189. |                     | <i>Hasora anura</i>               |
| 190. |                     | <i>Lobocla bifasciata</i>         |
| 191. |                     | <i>Capila pennicillatum</i>       |
| 192. |                     | <i>Capila translucida</i>         |
| 193. |                     | <i>Capila lineata</i>             |
| 194. |                     | <i>Abraximorpha davidii</i>       |
| 195. |                     | <i>Abraximorpha heringi</i>       |
| 196. |                     | <i>Celaenorrhinus leucocera</i>   |
| 197. |                     | <i>Celaenorrhinus vietnamicus</i> |
| 198. |                     | <i>Celaenorrhinus maculosus</i>   |
| 199. |                     | <i>Celaenorrhinus aspersus</i>    |
| 200. |                     | <i>Celaenorrhinus yaojiani</i>    |
| 201. |                     | <i>Pseudocoladenia dan</i>        |
| 202. |                     | <i>Gerosis sinica</i>             |
| 203. |                     | <i>Tagiades menaka</i>            |
| 204. |                     | <i>Tagiades litigiosa</i>         |
| 205. |                     | <i>Tagiades cohaerens</i>         |
| 206. |                     | <i>Astictopterus jama</i>         |
| 207. |                     | <i>Iambrix salsala</i>            |
|      |                     | <i>Udaspes folus</i>              |

---

---

|      |                    |                                |
|------|--------------------|--------------------------------|
| 208. | <i>Notocrypta</i>  | <i>Notocrypta feisthamelii</i> |
| 209. |                    | <i>Notocrypta curvifascia</i>  |
| 210. |                    | <i>Notocrypta paralysos</i>    |
| 211. | <i>Erionota</i>    | <i>Erionota torus</i>          |
| 212. | <i>Matapa</i>      | <i>Matapa aria</i>             |
| 213. | <i>Zographetus</i> | <i>Zographetus satwa</i>       |
| 214. | <i>Isoteinon</i>   | <i>Isoteinon lamprospilus</i>  |
| 215. | <i>Halpe</i>       | <i>Halpe gamma</i>             |
| 216. | <i>Thoressa</i>    | <i>Thoressa xiaoqingae</i>     |
| 217. | <i>Ampittia</i>    | <i>Ampittia virgata</i>        |
| 218. |                    | <i>Ampittia dioscorides</i>    |
| 219. | <i>Onryza</i>      | <i>Onryza maga</i>             |
| 220. | <i>Ochlodes</i>    | <i>Ochlodes klapperichii</i>   |
| 221. | <i>Thymelicus</i>  | <i>Thymelicus leonius</i>      |
| 222. | <i>Potanthus</i>   | <i>Potanthus flavus</i>        |
| 223. |                    | <i>Potanthus trachalus</i>     |
| 224. |                    | <i>Potanthus pava</i>          |
| 225. |                    | <i>Potanthus confucius</i>     |
| 226. | <i>Telicota</i>    | <i>Telicota ohara</i>          |
| 227. |                    | <i>Telicota linna</i>          |
| 228. |                    | <i>Telicota besta</i>          |
| 229. | <i>Parnara</i>     | <i>Parnara ganga</i>           |
| 230. |                    | <i>Parara guttata</i>          |
| 231. |                    | <i>Parnara batta</i>           |
| 232. | <i>Borbo</i>       | <i>Borbo cinnara</i>           |
| 233. | <i>Pelopidas</i>   | <i>Pelopidas assamensis</i>    |
| 234. |                    | <i>Pelopidas mathias</i>       |
| 235. | <i>Aeromachus</i>  | <i>Aeromachus jhora</i>        |
| 236. | <i>Caltoris</i>    | <i>Caltoris cahira</i>         |
| 237. |                    | <i>Caltoris bromus</i>         |

---

**Supplementary Table S2.** The sampling coverage was estimated using the “iNEXT” package in R across all grids.

| NO. | Grid number | Sample coverage |
|-----|-------------|-----------------|
| 1   | A07         | 0.355           |
| 2   | A08         | 0.752           |
| 3   | B06         | 0.640           |
| 4   | B07         | 0.644           |
| 5   | B08         | 0.894           |
| 6   | C06         | 0.542           |
| 7   | C07         | 0.781           |
| 8   | C08         | 0.829           |
| 9   | C09         | 0.667           |
| 10  | D05         | 0.815           |
| 11  | D06         | 0.840           |
| 12  | D07         | 0.864           |
| 13  | D08         | 0.900           |
| 14  | D09         | 0.578           |
| 15  | E05         | 0.521           |
| 16  | E06         | 0.660           |
| 17  | E07         | 0.854           |
| 18  | E08         | 0.828           |
| 19  | E09         | 0.794           |
| 20  | E10         | 0.606           |
| 21  | E11         | 0.835           |
| 22  | F03         | 0.558           |
| 23  | F04         | 0.618           |
| 24  | F05         | 0.721           |
| 25  | F06         | 0.750           |
| 26  | F07         | 0.742           |
| 27  | F08         | 0.342           |
| 28  | F09         | 0.590           |
| 29  | F10         | 0.605           |
| 30  | G02         | 0.572           |
| 31  | G03         | 0.828           |
| 32  | G04         | 0.754           |
| 33  | G05         | 0.725           |
| 34  | G06         | 0.612           |
| 35  | G07         | 0.773           |
| 36  | G08         | 0.874           |
| 37  | G09         | 0.579           |
| 38  | G10         | 0.727           |
| 39  | H01         | 0.928           |
| 40  | H02         | 0.720           |



---

|    |     |       |
|----|-----|-------|
| 41 | H03 | 0.862 |
| 42 | H04 | 0.694 |
| 43 | H05 | 0.936 |
| 44 | H06 | 0.759 |
| 45 | H07 | 0.773 |
| 46 | H08 | 0.776 |
| 47 | H09 | 0.548 |
| 48 | I03 | 0.765 |
| 49 | I04 | 0.704 |
| 50 | I05 | 0.877 |
| 51 | I06 | 0.707 |
| 52 | I07 | 0.655 |
| 53 | I08 | 0.795 |
| 54 | I09 | 0.612 |
| 55 | J03 | 0.571 |
| 56 | J04 | 0.807 |
| 57 | J05 | 0.725 |
| 58 | J06 | 0.927 |
| 59 | J07 | 0.834 |
| 60 | J08 | 0.903 |
| 61 | J09 | 0.624 |
| 62 | K05 | 0.527 |
| 63 | K06 | 0.410 |
| 64 | K07 | 0.867 |
| 65 | K08 | 0.601 |
| 66 | K09 | 0.611 |
| 67 | K10 | 0.744 |
| 68 | L05 | 0.652 |
| 69 | L06 | 0.632 |
| 70 | L07 | 0.492 |
| 71 | L08 | 0.560 |
| 72 | M06 | 0.873 |
| 73 | M07 | 0.702 |
| 74 | M08 | 0.697 |
| 75 | N06 | 0.852 |
| 76 | N07 | 0.731 |
| 77 | N08 | 0.504 |
| 78 | O06 | 0.795 |
| 79 | O07 | 0.822 |
| 80 | P05 | 0.790 |

---

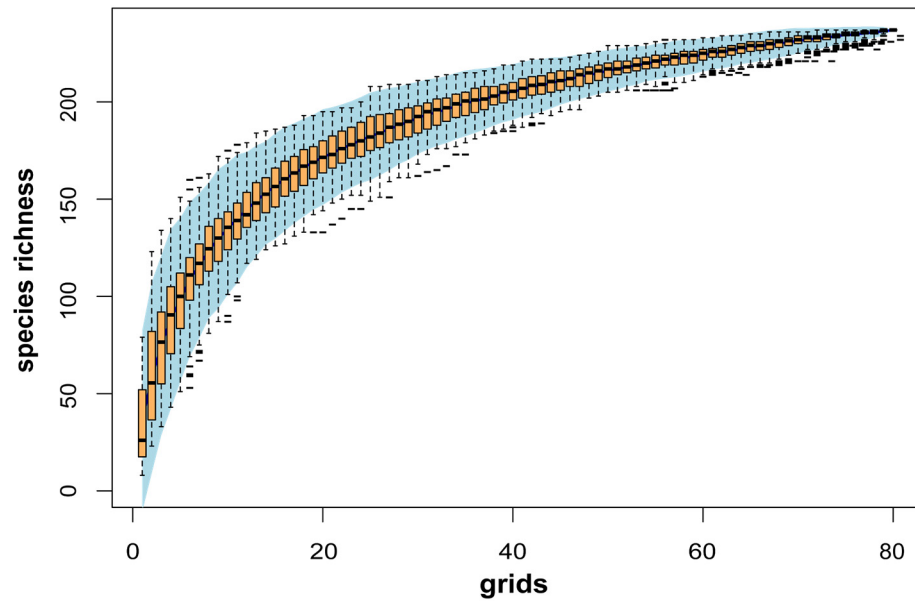

**Supplementary Figure S1.** Species accumulation curves of the observed butterfly samples in Chebaling.

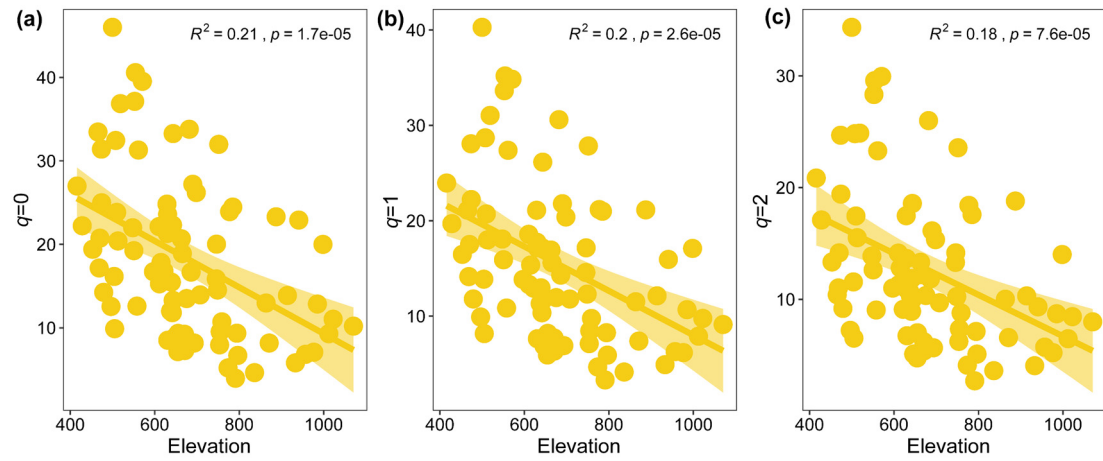

**Supplementary Figure S2.** Variations of (a) Hill numbers ( $q = 0$ ), (b) Hill numbers ( $q = 1$ ), and (c) Hill numbers ( $q = 2$ ) of butterflies along elevation in Chebaling, regression lines refer to the significant relationship between the two variables detected through linear models and shading areas associated with the lines represent the 95% confidence interval.

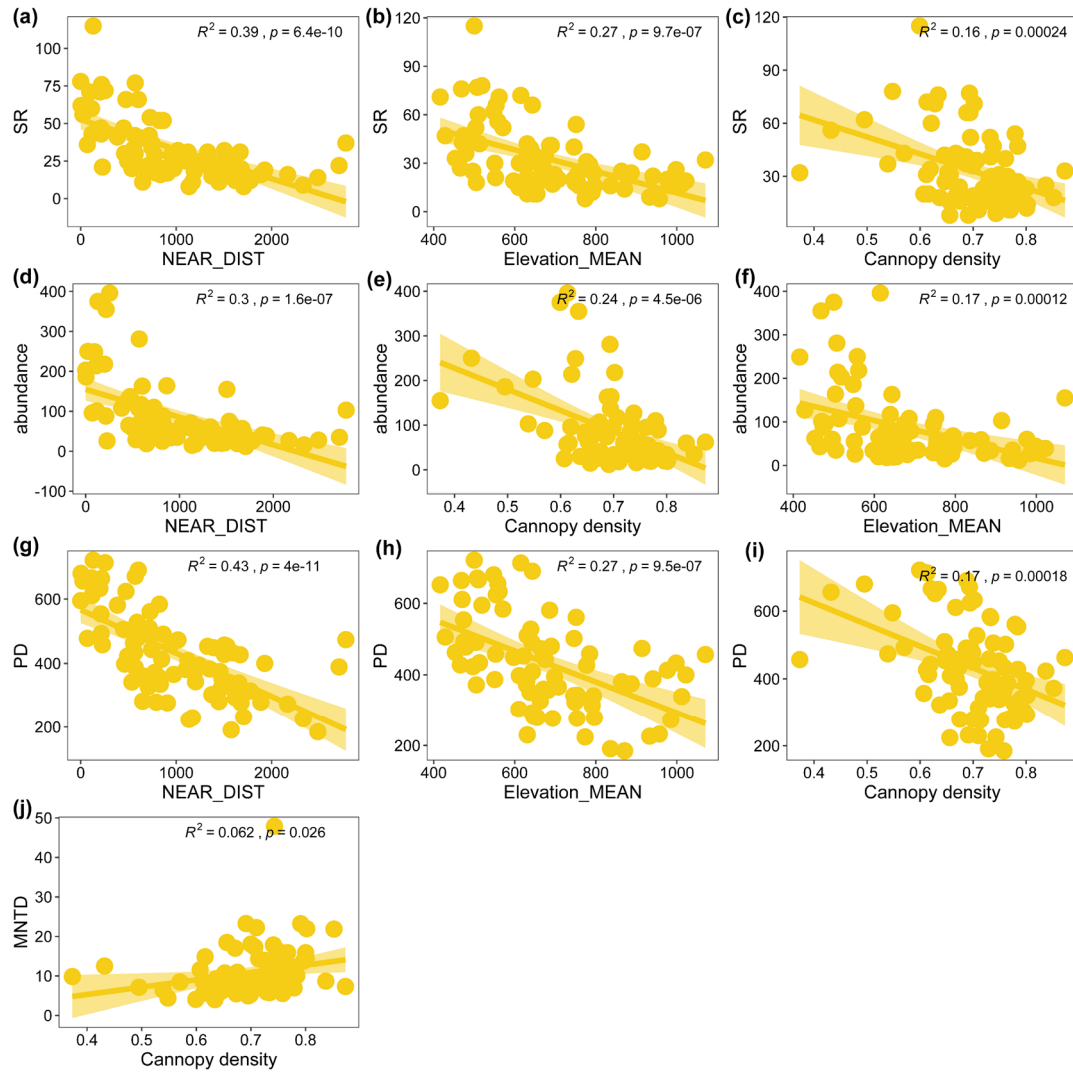

**Supplementary Figure S3.** Correlation between diversity indices and environmental factors (the most important drivers analyzed by Random Forest model). Relationships between NEAR\_DIST and (a) species richness (SR), (d) abundance, (g) Faith's phylogenetic diversity (PD), and (j) mean nearest taxon distance (MNTD); relationships between Elevation\_MEAN and (b) SR, (f) abundance, and (h) PD; relationships between Canopy density and (c) SR, (e) abundance, and (i) PD. Regression lines refer to the significant relationship between the two variables detected through linear models and shading areas associated with the lines represent the 95% confidence interval.

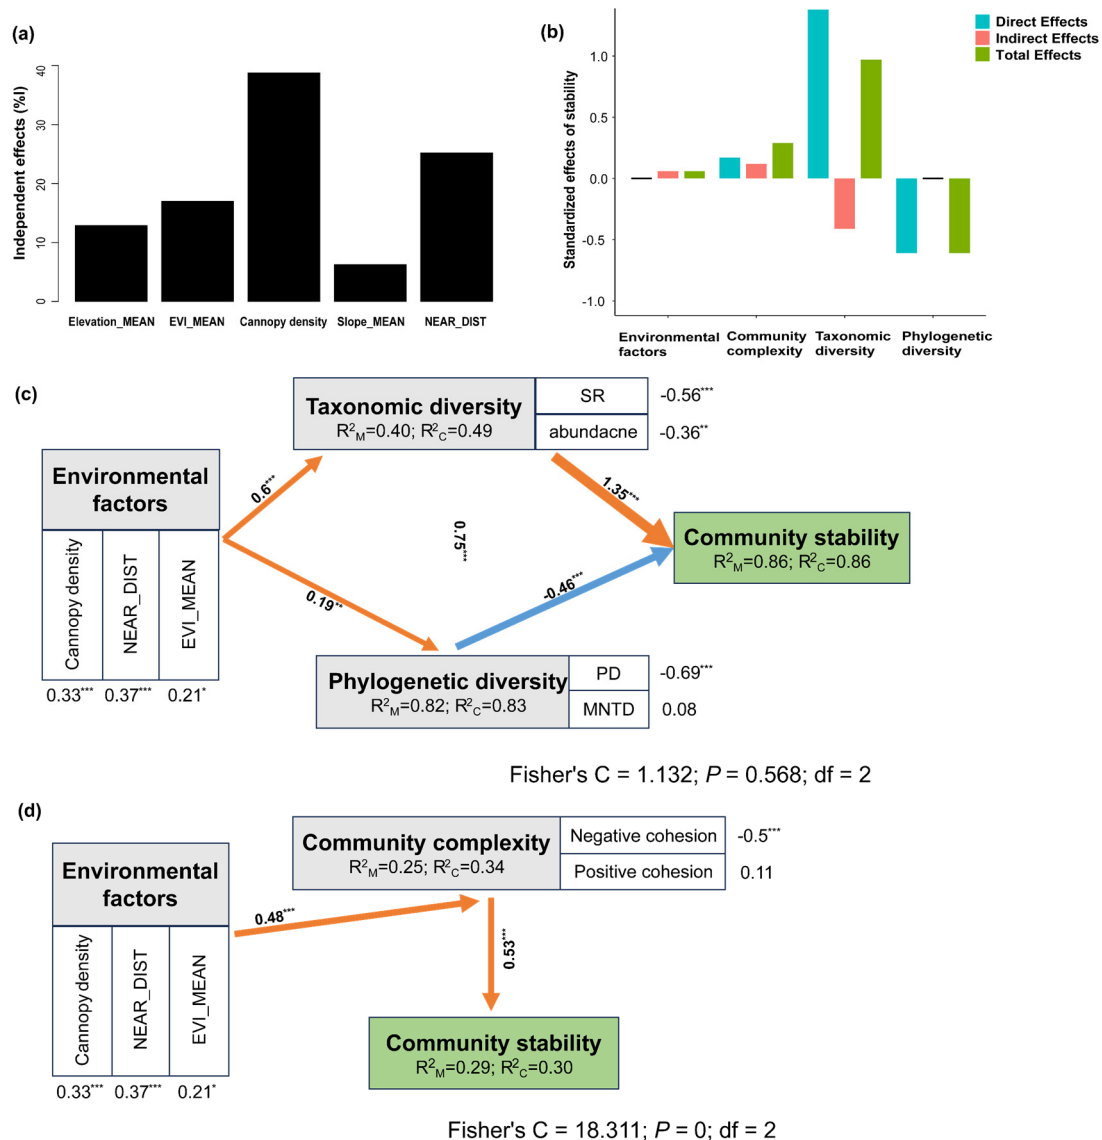

**Supplementary Figure S4.** (a) Visualization of the independent contributions of the different environmental factors to the community stability (result of R-function `hier.part`); (b) the direct, indirect, and total standardized effects of composite variables on community stability; (c) the direct and indirect effects of environmental factors, taxonomic diversity, and phylogenetic diversity on the responses of community stability using piecewiseSEM; (d) the direct and indirect effects of environmental factors and community complexity on the responses of community stability using piecewiseSEM. The environmental factors, community complexity, taxonomic diversity, and phylogenetic diversity were altered to composite variables. Numbers adjacent to measured variables are their coefficients with composite variables. Numbers adjacent to arrows are path coefficients are the directly standardized effect size of the relationship. The thickness of the arrow represents the strength of the relationship. The conditional (C) and marginal (M) R<sup>2</sup> represent the proportion of variance explained by all predictors without and with accounting for random effects of "sampling site". Significance levels of each predictor are \* $p < 0.05$ , \*\* $p < 0.01$ , \*\*\* $p < 0.001$ .

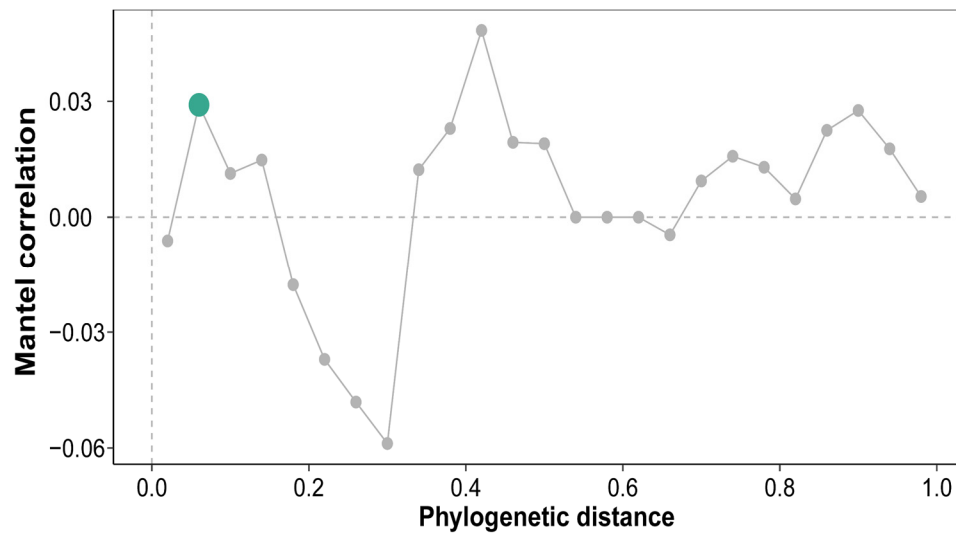

**Supplementary Figure S5.** Phylogenetic Mantel correlogram evaluating phylogenetic signal in the butterfly communities observed in this study. The plot relates Pearson correlation coefficients to phylogenetic distances classes. Significant correlations ( $P < 0.05$ ; green dots) indicate significant phylogenetic signal but only across relatively short phylogenetic distances.

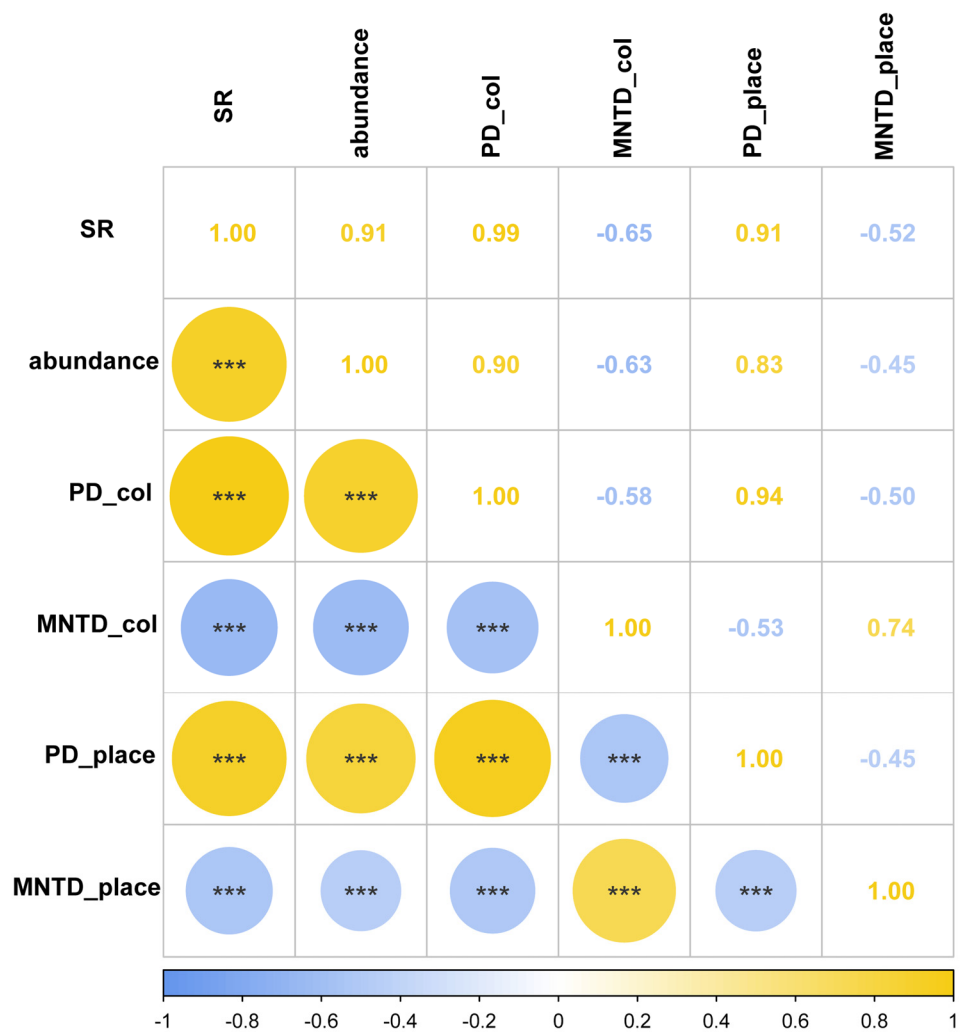

**Supplementary Figure S6.** Correlation among species richness (SR), abundance, Faith's phylogenetic diversity (PD), and mean nearest taxon distance (MNTD). PD\_col and MNTD\_col were calculated using the barcode-tree; PD\_place and MNTD\_place were calculated using the placement tree. Significance signs for correlation coefficients are marked in the circles: \* means  $p < 0.05$ , \*\* means  $p < 0.01$ , \*\*\* means  $p < 0.001$ .
